# Supplementary material
Source: publisher figshare collection journal article supplement (https://tandf.figshare.com/articles/dataset/_/6982454)
Supplement: Supplementary file 1 [file 1]

## GLX1-1

```

GLX1-1_1  MVRIIPMAASSIRPSLACFSDSPRPFISLLSRNLRTLHVPQSQFLGTLTKHLLRRSVNC
GLX1-1_2  -----
GLX1-1_1  LGVAESGKAAQATTQDDLLTWKNDKRRMLHVYRVGDMDRITIKFYTECLGMKLLRKRD
GLX1-1_2  -----MLHVYRVGDMDRITIKFYTECLGMKLLRKRD
*****

GLX1-1_1  PEEKYTNAFLGYGPDSSHFIETLYNYGVDKYDIGAGFGHFGIAVDDVAKTVELVKAKGG
GLX1-1_2  PEEKYTNAFLGYGPDSSHFIETLYNYGVDKYDIGAGFGHFGIAVDDVAKTVELVKAKGG
*****

GLX1-1_1  KVSREPGFVKGGKTVIAFIEDPDGYKFELLERGPTPEPLCQVMLRVGDLRAIKFYEKAF
GLX1-1_2  KVSREPGFVKGGKTVIAFIEDPDGYKFELLERGPTPEPLCQVMLRVGDLRAIKFYEKAF
*****

GLX1-1_1  GMELLRTRDNPEYKTIAMMGYPEDKFPVLELTYNYGVTYDKGNAYAQIAIGTDDVYK
GLX1-1_2  GMELLRTRDNPEYKTIAMMGYPEDKFPVLELTYNYGVTYDKGNAYAQIAIGTDDVYK
*****

GLX1-1_1  TAAAIKLFGGKITREPGLPGISTKITACLDPDGKSVFVDNIDFLKELE
GLX1-1_2  TAAAIKLFGGKITREPGLPGISTKITACLDPDGKSVFVDNIDFLKELE
*****

```

## GLX1-2

```

GLX1-2_1  -----MAEASDLEWPKKNRRFLHV
GLX1-2_2  -----MAEASDLEWPKKNRRFLHV
GLX1-2_3  -----MAEASDLEWPKKNRRFLHV
GLX1-2_4  -----MAEASDLEWPKKNRRFLHV
GLX1-2_5  -----MAEASDLEWPKKNRRFLHV
GLX1-2_6  MNEIASASMLRLCQCFCISICNVHFSMRAESSFLSRNMAEASDLEWPKKNRRFLHV
*****

GLX1-2_1  VYRVGDLDRITIEFYTEVFGMKLLRKRDIPEEKYSNAFLGFGPETSNFVVELTYNYGVSSY
GLX1-2_2  VYRVGDLDRITIEFYTEVFGMKLLRKRDIPEEKYSNAFLGFGPETSNFVVELTYNYGVSSY
GLX1-2_3  VYRVGDLDRITIEFYTEVFGMKLLRKRDIPEEKYSNAFLGFGPETSNFVVELTYNYGVSSY
GLX1-2_4  VYRVGDLDRITIEFYTEVFGMKLLRKRDIPEEKYSNAFLGFGPETSNFVVELTYNYGVSSY
GLX1-2_5  VYRVGDLDRITIEFYTEVFGMKLLRKRDIPEEKYSNAFLGFGPETSNFVVELTYNYGVSSY
GLX1-2_6  VYRVGDLDRITIEFYTEVFGMKLLRKRDIPEEKYSNAFLGFGPETSNFVVELTYNYGVSSY
*****

GLX1-2_1  DIGTGFHFAISTQDVSKLVENVRAGGNVTRPGPVKGGGSVIAFVKDPDGYTFELIQR
GLX1-2_2  DIGTGFHFAISTQDVSKLVENVRAGGNVTRPGPVKGGGSVIAFVKDPDGYTFELIQR
GLX1-2_3  DIGTGFHFAISTQDVSKLVENVRAGGNVTRPGPVKGGGSVIAFVKDPDGYTFELIQR
GLX1-2_4  DIGTGFHFAISTQDVSKLVENVRAGGNVTRPGPVKGGGSVIAFVKDPDGYTFELIQR
GLX1-2_5  DIGTGFHFAISTQDVSKLVENVRAGGNVTRPGPVKGGGSVIAFVKDPDGYTFELIQR
GLX1-2_6  DIGTGFHFAISTQDVSKLVENVRAGGNVTRPGPVKGGGSVIAFVKDPDGYTFELIQR
*****

GLX1-2_1  GPTPEPFCQVMLRVGDLRAIKFYEKALGMRLLRKIERPEYKTYIGMMGYAEYESIVLE
GLX1-2_2  GPTPEPFCQVMLRVGDLRAIKFYEKALGMRLLRKIERPEYKTYIGMMGYAEYESIVLE
GLX1-2_3  GPTPEPFCQVMLRVGDLRAIKFYEKALGMRLLRKIERPEYKTYIGMMGYAEYESIVLE
GLX1-2_4  GPTPEPFCQVMLRVGDLRAIKFYEKALGMRLLRKIERPEYKTYIGMMGYAEYESIVLE
GLX1-2_5  GPTPEPFCQVMLRVGDLRAIKFYEKALGMRLLRKIERPEYKTYIGMMGYAEYESIVLE
GLX1-2_6  GPTPEPFCQVMLRVGDLRAIKFYEKALGMRLLRKIERPEYKTYIGMMGYAEYESIVLE
*****

GLX1-2_1  LTYNYDVTEYTKGNAYAQIAIGTDDVYKSSEVIRKIVNQELGGKITREAGPLGLGTRKIVS
GLX1-2_2  LTYNYDVTEYTKGNAYAQIAIGTDDVYKSSEVIRKIVNQELGGKITREAGPLGLGTRKIVS
GLX1-2_3  LTYNYDVTEYTKGNAYAQIAIGTDDVYKSSEVIRKIVNQELGGKITREAGPLGLGTRKIVS
GLX1-2_4  LTYNYDVTEYTKGNAYAQIAIGTDDVYKSSEVIRKIVNQELGGKITREAGPLGLGTRKIVS
GLX1-2_5  LTYNYDVTEYTKGNAYAQAQMMCTKAVKLLR-----
GLX1-2_6  LTYNYDVTEYTKGNAYAQIAIGTDDVYKSSEVIRKIVNQELGGKITREAGPLGLGTRKIVS
*****

GLX1-2_1  FLDPDGWKTIVLDNKKDFLKELE
GLX1-2_2  FLDPDGWKTIVLDNKKDFLKELE
GLX1-2_3  FLDPDGWKTIVLDNKKDFLKELE
GLX1-2_4  FLDPDGWKTIVLDNKKDFLKELE
GLX1-2_5  -----
GLX1-2_6  FLDPDGWKTIVLDNKKDFLKELE

```

## GLX1-3

```

GLX1-3_1  -----MASEARESPA
GLX1-3_2  -----MASEARESPA
GLX1-3_3  -----MASEARESPA
GLX1-3_4  MSSYSIASAISRISPLIRFVKPYSTGFSFITACNSTRPKRFDQLCVSMASEARESPA
*****

GLX1-3_1  NNPGSLSTNRDEATKGYIMQQTMFRIKDPKASLDFYSRVLGMSLLKRLDFSEMKFSLYFLG
GLX1-3_2  NNPGSLSTNRDEATKGYIMQQTMFRIKDPKASLDFYSRVLGMSLLKRLDFSEMKFSLYFLG
GLX1-3_3  NNPGSLSTNRDEATKGYIMQQTMFRIKDPKASLDFYSRVLGMSLLKRLDFSEMKFSLYFLG
GLX1-3_4  NNPGSLSTNRDEATKGYIMQQTMFRIKDPKASLDFYSRVLGMSLLKRLDFSEMKFSLYFLG
*****

GLX1-3_1  YEDTTAPTDPDPTERTVWTFGQPATIELTHNWGTESDPEFKGYHNGNSEPRGFHIGVTV
GLX1-3_2  YEDTTAPTDPDPTERTVWTFGQPATIELTHNWGTESDPEFKGYHNGNSEPRGFHIGVTV
GLX1-3_3  YEDTTAPTDPDPTERTVWTFGQPATIELTHNWGTESDPEFKGYHNGNSEPRGFHIGVTV
GLX1-3_4  YEDTTAPTDPDPTERTVWTFGQPATIELTHNWGTESDPEFKGYHNGNSEPRGFHIGVTV
*****

GLX1-3_1  DVHKACERFEELGVEFAKKPNDGKMKNIATIKDPDGYWIEIFDLKTI GTTTVNA
GLX1-3_2  DVHKACERFEELGVEFAKKPNDGKMKNIATIKDPDGYWIEIFDLKTI GTTTVNA
GLX1-3_3  DVHKACERFEELGVEFAKKPNDGKMKNIATIKDPDGYWIEIFDLKTI GTTTVNA
GLX1-3_4  DVHKACERFEELGVEFAKKPNDGKMKNIATIKDPDGYWIEIFDLKTI GTTTVNA
*****

```

**Supplemental Fig. S1.** Amino acid sequences for each AtGLX1 splice variant.

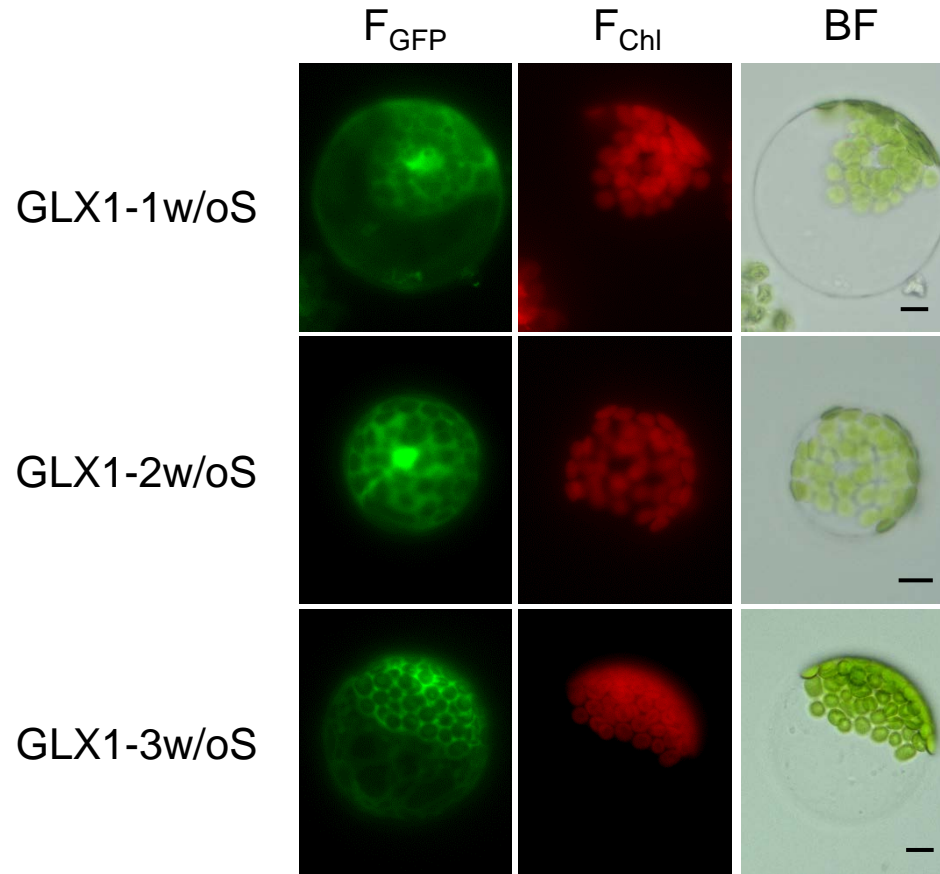

**Supplemental Fig. S2.** Subcellular localisation of GLX1w/oS–GFP fusion proteins expressed in *A. thaliana* mesophyll protoplasts. Fluorescence images of GFP ( $F_{\text{GFP}}$ ), chlorophyll autofluorescence ( $F_{\text{Chl}}$ ), and the bright field (BF) are shown. Black bars = 10  $\mu\text{m}$ .

S6803GLX1 LLHTMIRVGDLDK-----SLQFYCDILGMNLLRKKDYPSEFTPLAFVGYGK-----ESENAVIELTHNWGTDK-----  
 EcGLX1 LLHTMIRVGDLDK-----SIDFYTKVLGMKLLRSTENPEYKYSLAFVGYGP-----ETEEAVIELTYNWGVDK-----  
 OsGLX1-1 LLHVYVRVGDIDR-----TIKFYTECLGMKLLRKRDIPEEKYTNAFVLGYGA-----EDNHFVVELTYNYGVDK-----  
 ZmGLX1-1 LLHVYVRVGDLDK-----TIKFYTECLGMKLLRKRDIPEEKYSNAFLGYGP-----EESHFVVELTYNYGVDK-----  
 AtGLX1-1 MLHVYVRVGDMDR-----TIKFYTECLGMKLLRKRDIPEEKYTNAFVLGYGP-----EDSHFVIELTYNYGVDK-----  
 MpGLX1-1 MLHVYVRVGDLDK-----TIKFYTECLGMKLLRKRDFPDEKYTNAFVLGYGP-----EDSHFVVELTYNYGVFS-----  
 SmGLX1-1 MLHVYVRVGDLDK-----TIKFYTECLGMKLLRKRDIPEERYTNAFVLGYGP-----EDSHFVVELTYNYGVDK-----  
 OsGLX1-3 MLHVYVRVGDLDK-----TIKFYTECLGMKLLRKRDIPEERYTNAFVLGYGP-----EDSHFVVELTYNYGVES-----  
 ZmGLX1-4 LLHVYVRVGDLDK-----TIKFYTECLGMKLLRKRDIPEERYTNAFVLGYGP-----EDSHFVVELTYNYGVES-----  
 CvGLX1-1 MLHAVYRVGDDMA-----TIKYQDCFCGMKLLRFRDIKEEKYSNAFLGYGP-----EETHFAMELTYNYGVDS-----  
 OsGLX1-2 LLHAVYRVGDLDR-----TIKCYTECFGMKLLRKRDPPEEKYTNAFVLGFGE-----EDTNFAVELTYNYGVDK-----  
 ZmGLX1-3 MLHAVYRVGDLDR-----TIKYYTECFGMKLLRKRDPPEEKYTNAFVLGFGE-----ENTNFAVELTYNYGVDK-----  
 ZmGLX1-2 MLHAVYRVGDLDRTIKYAHLQLRVMLFVHYTECFGMKLLRKRDIPEEKYTNAFVLGFGE-----EDTNFAVELTYNYGVDK-----  
 AtGLX1-2 FLHVYVRVGDLDLDR-----TIEFYTEVFGMKLLRKRDIPEEKYSNAFLGFGE-----ETSNFVVELTYNYGVSS-----  
 MpGLX1-2 IQQTMIRIKDPKV-----SLDFYTRILGMTLLKRLDFPEMKFSLYFVGYED---PASIPTDPAERMAYTF---VLELTHNWGTESDENFK  
 MpGLX1-3 IQQTMIRIKDPKV-----SLDFYTRILGMTLLKRLDFPEMKFSLYFVGYED---PASIPTDPAERMAYTFSSKATLELTHNWGTESDENFK  
 SmGLX1-2 VQQTMIRIKDPKA-----SLDFYSRVLMGMTLLKRLDFPDSKFSLYFVGYED---SAAEPKDPPIERVWTFRRKATIELTHNWGTETDPDFK  
 OsGLX1-4 MQQTMIRIKDPKV-----SLDFYSRVLMGMTLLKRLDFPEMKFSLYFVGYED---VESAPTDPVKRTVWTFGQRATLELTHNWGTENDPEFK  
 ZmGLX1-5 LQQTMIRIKDPKV-----SLDFYSRVLMGMTLLKRLDFPEMKFSLYFVGYED---VTLAPDDHIKRTWTFRQKATLELTHNWGTENDPEFK  
 AtGLX1-3 MQQTMIRIKDPKA-----SLDFYSRVLMGMTLLKRLDFSEMKFSLYFVGYED---TTTAPTDPTERTVWTFGQPATIELTHNWGTESDPEFK  
 CvGLX1-2 FQQTMIRIKDPQP-----SLDFYTRVLMGMTLLKRLDFADMKFSLYFLAYQS---PEDVPADPVERAKWMFGLPACLELTHNWGTESDPDFK  
 PtGLX1 FSQTMIRIKDPKR-----SLAFYKAMGMKLLSEKHFN---DFSLYFLGSSN---VADG-----ADTKTLFQPVLELTHNHGTENDDDFR  
 CmGLX1 FAQTMIRIKDPK-----SRQFYEALG-MNFLTFRDFPPELSFSLYFFALEKDPVPAEDAPQPERAKWLFSRQYPTLELTHNWGTEDKPNFK  
 ScGLX1 LNHITCLRVKDPAR-----AVKFYTEHFGMKLLSRKDFEEAKFSLYFLSFPK-----DDIPKNKNGEPDVFAGHVLELTHNWGTENKPNFYK

S6803GLX1 →---YDLNGFGHIALGVEDIYSTCDKIRDK--GGKVVRPEPGPMKHGTTVIAFVEDPDGYKIEL  
 EcGLX1 ---YELGTAYGHIALSVDNAEAACEKIRQN--GGNVTREAGPVKGGTTVIAFVEDPDGYKIEL  
 OsGLX1-1 ---YDIGAGFGHFIADVDDVAKTVELIRAK--GGKVTRPEPGPVKGGKTVIAFVEDPDGYKFEI  
 ZmGLX1-1 ---YDIGAGFGHFIADVDDVAKTVELIRAK--AGKVIREAGPVKGGGETVIAFVEDPDGYKFEI  
 AtGLX1-1 ---YDIGAGFGHFIADVDDVAKTVELVKAK--GGKVSREPGPVKGGKTVIAFIEDPDGYKFEL  
 MpGLX1-1 ---YDIGTGFHFGIADVDDVQKVDLVKAK--GGVVSREPGPVKGGKSIVIAFVDDPDGYKFEL  
 SmGLX1-1 ---YDIGTGFHFGIADVDDVYKTVDLVKAK--GGKVSREAGPVKGGSTVIAFVDDPDGYKFEL  
 OsGLX1-3 ---YDIGTAFGHFIADVDDVAKTVDLIKAK--GGTVTREPGPVKGGKSIVIAFIEDPDGYKFEL  
 ZmGLX1-4 ---YNIPTGFHFGIADVDDVAKTVELIKAK--GGTVTREPGPVKGGKSIVIAFIEDPDGYKFEL  
 CvGLX1-1 ---YDLGEGFGHFIATPDAYKMEAVKAK--GGRVTREPGPTKGGKTVIAFVEDPTGYKFEL  
 OsGLX1-2 ---YDIGAGFGHFAIATEDVYKLAEEKISSCCCKITREPGPVKGGSTVIAFAQDPDGYMFEL  
 ZmGLX1-3 ---YDIGTGFHFGFAIANDDVYKLAENIKS--KGGKITREPGPVKGGSTVIAFAQDPDGYMFEL  
 ZmGLX1-2 ---YDIGTGFHFGFAIANEDG-----GKITRDPGPVKGGSSTVIAFAQDPDGYMFEL  
 AtGLX1-2 ---YDIGTGFHFGFAISTQDVSKLVENVRAK--GGNVTREPGPVKGGGSIVIAFVKDDPDGYTFEL  
 MpGLX1-2 GHHNGNSEPRGYGHIGITVDDTYKACERFEKM--GVKPVKKPDDGK--MKGVAFIQDPDGYWIEI  
 MpGLX1-3 GHHNGNSEPRGYGHIGITVDDTYKACERFEKM--GVKPVKKPDDGK--MKGLAFIQDPDGYWIEI  
 SmGLX1-2 GYHNGNADPRGYGHIGISVDDTYRACERFEKL--GVEFVKKPDDGS--MKGLAFIKDPDGYWIEI  
 OsGLX1-4 GYHNGNSDPRGFGHIGVTVDVHKACERFERL--GVEFVKKPDDGK--MKGIAFIKDPDGYWIEI  
 ZmGLX1-5 GYHNGNSDPRGFGHIGVTVDVHKACERFERL--GVEFVKKPDDGK--IKGIAFIKDPDGYWIEI  
 AtGLX1-3 GYHNGNSEPRGFGHIGVTVDVHKACERFEEL--GVEFAKKPNDGK--MKNIAFIKDPDGYWIEI  
 CvGLX1-2 GYHNGNTQPRGFGHIGLCVPDVEAACARFEEL--GVEFVKKPNDGK--MRNLAFIKDPDGYWIEI  
 PtGLX1 YYNGNEDRQGRFGHIGFLVDDVYKACDALRPL--GFGFRKEPDGGS--MKGLAFAYDPDGYWIEI  
 CmGLX1 YANGNTPEPKGYGHIGFLVDDLYASCAAVEKA--GYVVSRRKPGPFQ--VGEIAFVRDPDGYWIEL  
 ScGLX1 INNGNEEPRHGFHICFSVSDINKTCEELESQ--GVKPKRLSEGR--QKDIAPALDPDGYWIEL

**Supplemental Fig. S3.** Sequence comparison of the Glyoxalase domain (Pfam, PF00903) in the N-terminus of glyoxalase I (GLX1) among oxygenic phototrophs. Blue shading represents the metal-binding sites; orange shading represents substrate-binding sites. Navy arrows indicate the regions specific to Zn<sup>2+</sup>-dependent GLX1. S6803, cyanobacterium *Synechocystis* sp. PCC 6803; Cv, green alga *Chlorella variabilis*; Mp, liverwort *Marchantia polymorpha*; Sm, fern *Selaginella moellendorffii*; At, C<sub>3</sub> plant *Arabidopsis thaliana*; Os, C<sub>3</sub> plant *Oryza sativa*; Zm, C<sub>4</sub> plant *Zea mays*; Cm, red alga *Cyanidioschyzon merolae*; Pt, diatom *Phaeodactylum tricornutum*; Ec, heterotrophic prokaryote *Escherichia coli*; and Sc, heterotrophic eukaryote *Saccharomyces cerevisiae*.

OsGLX2-2 EYTVKNLKFILTVEPDNEKVKQKLEWAQKQREANQPTIPSTIGEEFETNTFMVRD-----LPEIQAKFGAKSPVEALREVRKTKDNW  
 ZmGLX2-2 EYTVKNLKFMLTLEPENKTKQKLEWAQKQREANQPTVPSTIGDEFEINTFMVRD-----LPEIQAKFSVNSPVEAMREVRKTKDNW  
 AtGLX2-2 EYTVKNLEFALTVEPNNGKIQQKLAWARQQRQADLPTIPSTLEEELETNPFMRVD-----KPEIQEKLKCKSPIDTMREVRNKKDQW  
 SmGLX2-2 EYTAKNLKFAMSVDPHNDALKQKVAWTEEQRNRDKPTVPSTIREELQTNPFMRVN-----VKEFQVHMGESDPVELLASLRAAKDQF  
 CmGLX2 EYTVANLAFALTVEPNNESIRNKLKEAERLRAENKATIPSTVGGEQQWNVFLRA-----ADAQWMTELREKKNRF  
 AtGLX2-4 EYTLSNSKFALSIEPTNEVLQSYAAYVAELRDKKLPTIPTTMKMEKACNPFLRT---ENTDIRRALGIPETADEAEALGIIRRAKDNF  
 AtGLX2-5 EYTLSNSKFALSLEPNNEVLQSYAAHVAELRSKKLPTIPTTVKMEKACNPFLRS---SNTDIRRALRIPEAADEAEALGIIRRAKDDF  
 OsGLX2-1 EYTLSNSKFALSIEPGNKDLQEYAANAADLRKRNTPTVPTTIGREKQCNPFLLRT---SSPEIKNTLSIPDHFDDARVLEVVRRAKDNF  
 ZmGLX2-1 EYTLNNAKFALSVEPGNKALQEYAANAAELRNKNIPTVPTTIGREKECNPFLLRT---SNPEIKRTLSPVDHDFEDRVLGVVRRAKDNF  
 CvGLX2 EYTASNAKFAAHVDEGNEDLQRMKADIEAKRARGEPTVPSQLGDELKCNPFLLRPGTLDSPAIRSKLGVPEGASNDVAFGAIRAAKDTF  
 PtGLX2 EYTSSNAKFALAIIEPGNSALVSRAEEIKATREERGEPTVPSNLGVEKQTNPFLLR---CDMSAEIRQNIQVKISDSADVFGRIRKAKDKF  
 MpGLX2-1 EYTLNNAKFAMSVEPQNEALSSRYEKVAELRRKGLPTVPTSLGEEKSFNPFLLRP---FSQELRKSVHLNSSASDVETFAAVRLAKDRY  
 SmGLX2-1 EYTLNNAKFAMTIEPNPALNSHFEEKVKQLRDSGLATIPSSVGEEKKFNPFLLRP---ASREIRRSNLNLSDDASDSVFAAVRKAKDRA  
 MpGLX2-2 EYTASNIRFAVTVEPHNEDLLSQRQLVEQLRQKGQPTIPTTIGQENSFNPFLLRP---FVESVRQSLNKSASENNVEVFTALRLAKDKF  
 S6803GLX2 EYTLGNLKFALTVDPSNKLQERFQTVQGDQRQATIPSWLGTEKRTNPFLLRW---DNPAIQARVGMTEP---ARVFGKLRGMKDNF  
 EcGLX2 EYTLNNAKFALSILPHDLSINDYYRKVKELRAKNQITLPVILKNERQINVFLRTED--IDLINVINEETLLQQPEERFAWLRSKKDRF  
 ScGLX2 EYTSNDNVKFVRKIYPQVGENKALDELEQFCCKHEVTAGRFTLKDEVEFNPFMRLE--DPKVQKAAGDTNNSWDRAQIMDKLRAMKNRM

**Supplemental Fig. S4.** Sequence comparison of the hydroxyacylglutathione hydrolase domain (Pfam, PF16123) in the C-terminus of glyoxalase II (GLX2) among oxygenic phototrophs. Orange shading indicates substrate-binding sites. S6803, cyanobacterium *Synechocystis* sp. PCC 6803; Cv, green alga *Chlorella variabilis*; Mp, liverwort *Marchantia polymorpha*; Sm, fern *Selaginella moellendorffii*; At, C<sub>3</sub> plant *Arabidopsis thaliana*; Os, C<sub>3</sub> plant *Oryza sativa*; Zm, C<sub>4</sub> plant *Zea mays*; Cm, red alga *Cyanidioschyzon merolae*; Pt, diatom *Phaeodactylum tricornutum*; Ec, heterotrophic prokaryote *Escherichia coli*; and Sc, heterotrophic eukaryote *Saccharomyces cerevisiae*.
